# Supplementary material
Source: Springer Nature journal article supplement (https://www.springermedizin.de/resource/supplementary/12946_2011_144_MOESM5_ESM.pdf/9555258)

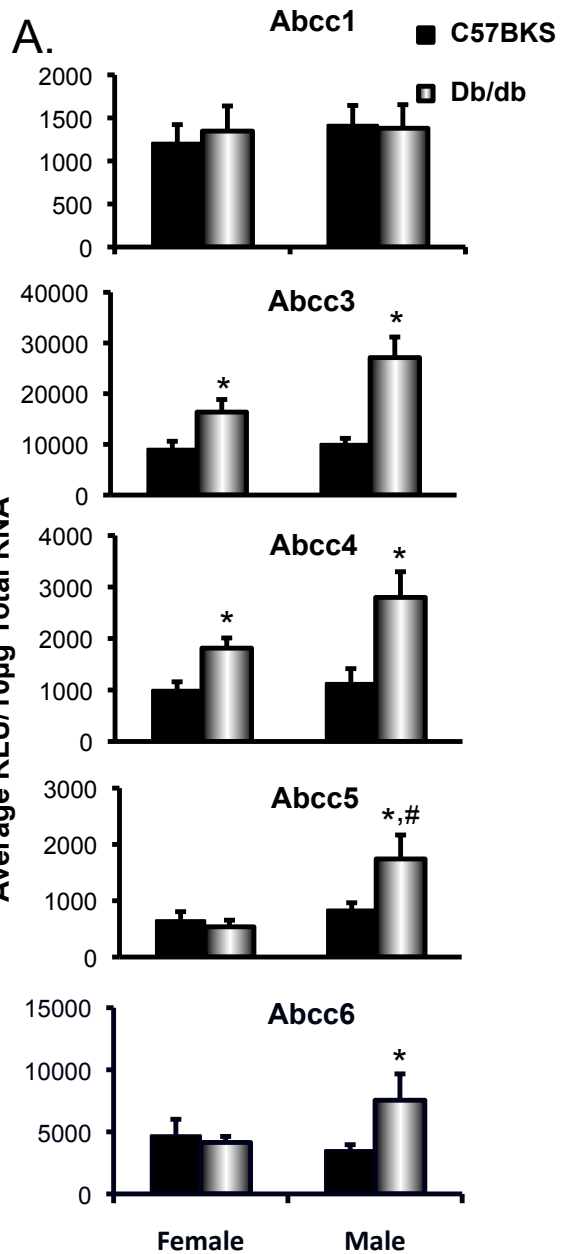

**B.**

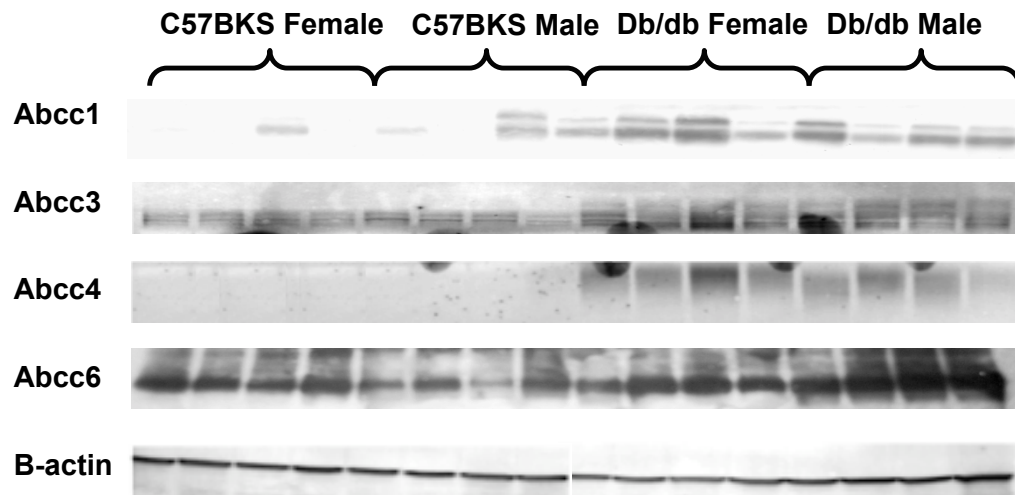

**C.**

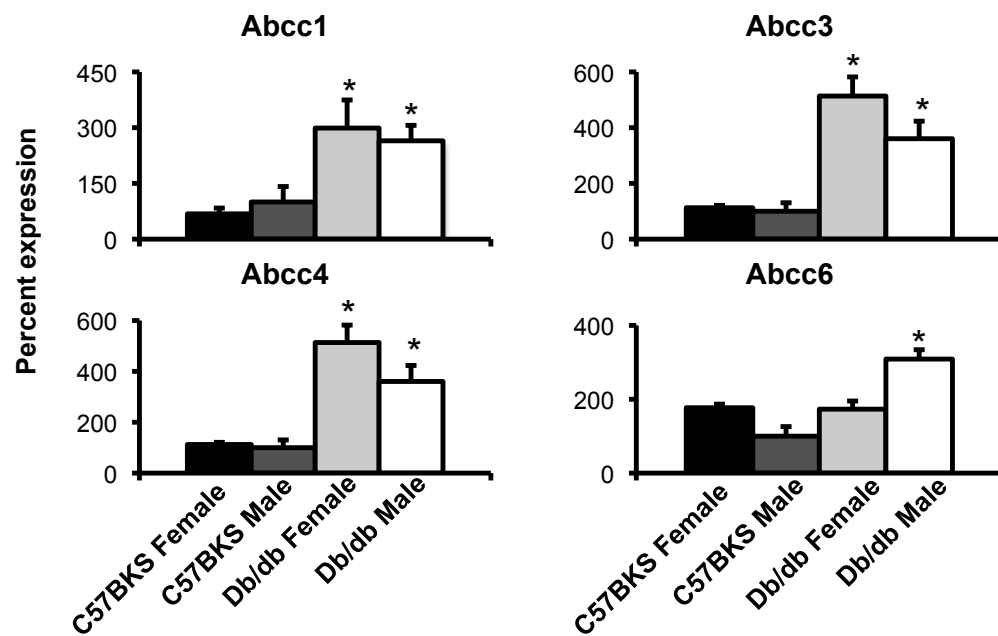

Supplement: MOESM5 [file 9555258]
